# Supplementary material for: A machine learning framework for predicting drug–drug interactions
Source: PubMed Central journal article supplement (PMC8413337; doi:10.1038/s41598-021-97193-8), 2021-09-02
Supplement: 41598_2021_97193_MOESM1_ESM.pdf [file 41598_2021_97193_MOESM1_ESM.pdf]

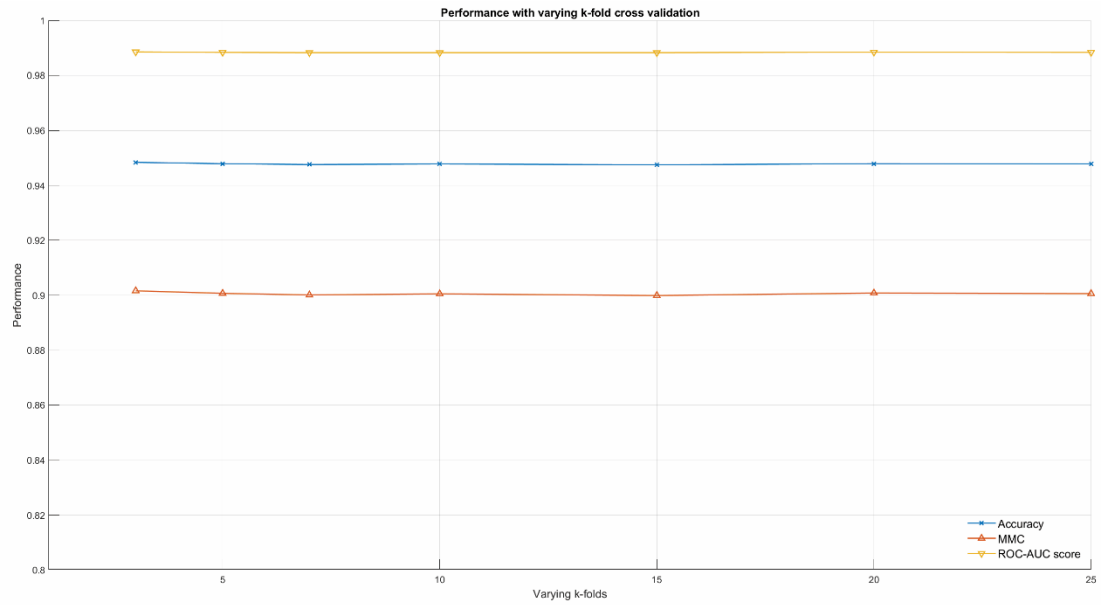

**Figure S1** Performance with varying  $k$ -fold cross validation ( $k=3, 5, 7, 10, 15, 20, 25$ ) in terms of Accuracy, MCC and ROC-AUC score.
